# Supplementary material for: Regulatory T cells control endothelial chemokine production and migration of T cells into intestinal tumors of APCmin/+ mice
Source: Springer Nature journal article supplement (doi:10.1007/s00262-018-2161-9), 2018-04-18
Supplement: MOESM1 [file 15701820]

## Supplementary figures

Supplementary table 1. Characteristics of the colon cancer patients included in the study.

|                       |            | females | males |
|-----------------------|------------|---------|-------|
|                       | n          | 17      | 24    |
|                       | age        | 52-89   | 42-89 |
| Tumor location        | ascending  | 7       | 13    |
|                       | transverse | 5       | 5     |
|                       | descending | 5       | 6     |
| Differentiation grade | high       | 3       | 2     |
|                       | medium     | 11      | 19    |
|                       | low        | 3       | 2     |
|                       | mucinous   | -       | 1     |
| Tumor stage           | T1         | -       | 1     |
|                       | T2         | -       | 2     |
|                       | T3         | 12      | 14    |
|                       | T4         | 5       | 7     |
| Lymph node spread     |            | 11      | 12    |
| Distant metastases    |            | 1       | 1     |

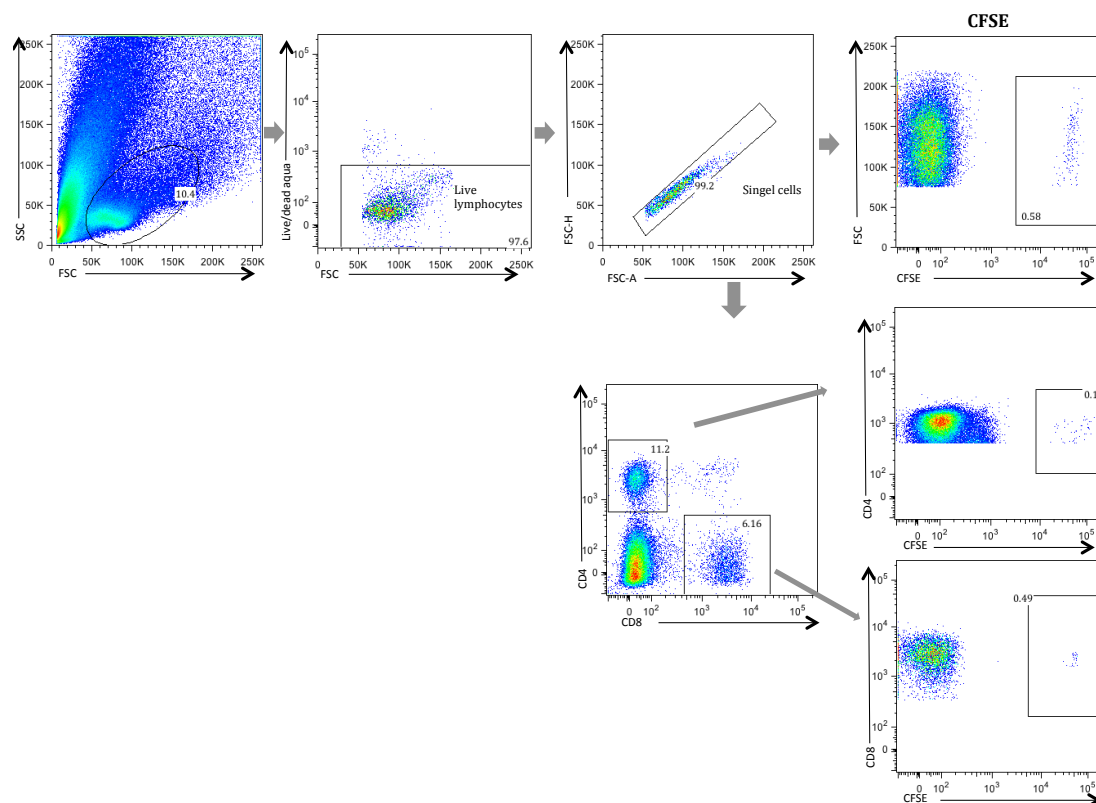

Supplementary figure 1: Gating strategy to detect migrating cells.

Gating strategy and representative flow cytometry plots showing CFSE expression among live single cells lymphocytes, CD4<sup>+</sup> and CD8<sup>+</sup> T cells in small intestinal tumor tissue from APC<sup>min/+</sup> mice after adoptive transfer.

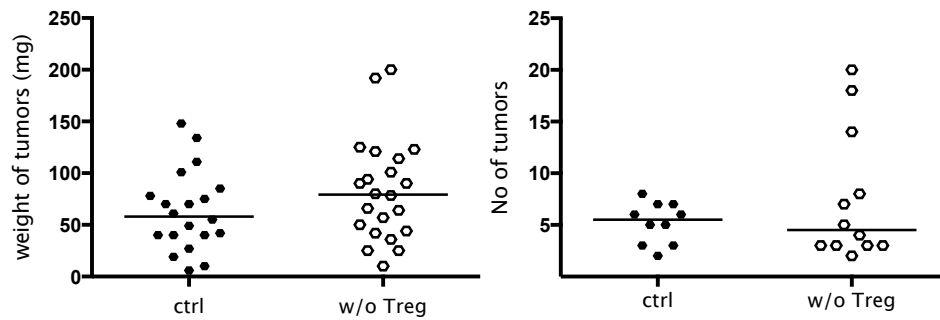

**Supplementary figure 2: Unchanged tumor load after short-term Treg depletion.**

DT treated 18-week old  $APC^{min/+}$ /DEREG mice and control  $APC^{min/+}$  mice were sacrificed and small intestinal tumor tissue was collected and weighted. Symbols represent individual mice and lines represent median (n=10-21).

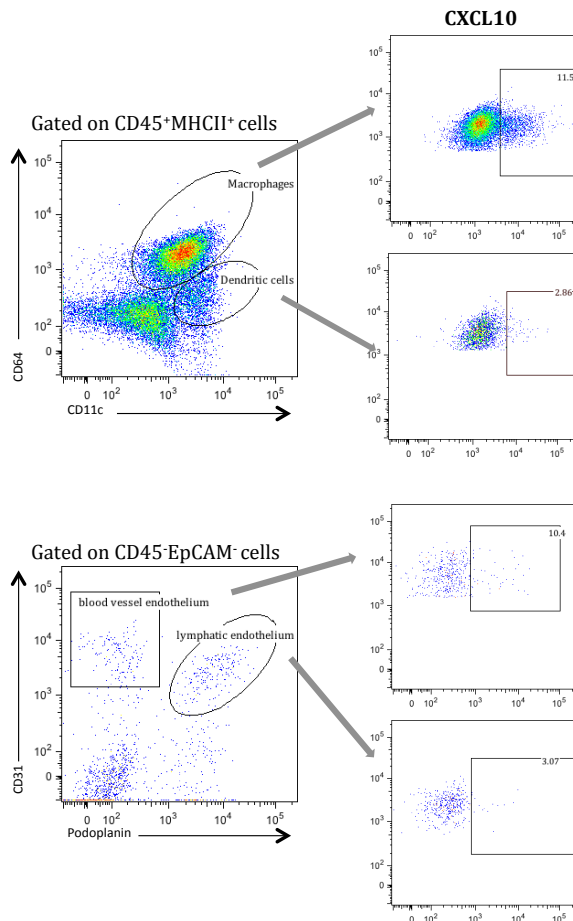

**Supplementary figure 3: CXCL10 expression in intestinal tumors.**

Representative flow cytometry plots showing CXCL10 expression among macrophages ( $MHCII^+CD64^+$ ), dendritic cells ( $MHCII^+CD11b^+$ ), blood vessel endothelial cells ( $CD31^+Podoplanin^+$ ) and lymphatic endothelial cells ( $CD31^+Podoplanin^+$ ) in small intestinal tumor tissue from DT-treated  $APC^{min/+}$ /DEREG mice.

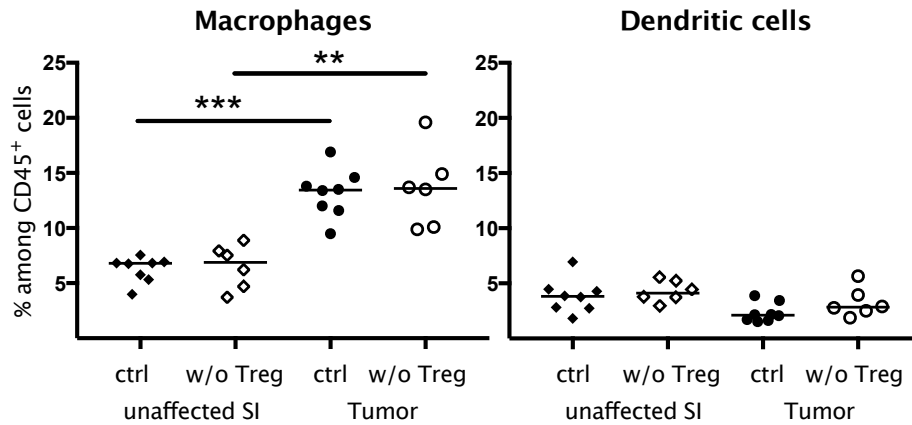

**Supplementary figure 4: Macrophage and dendritic cell frequencies in intestinal tumors.**

Frequencies of macrophages (MHCII<sup>+</sup>CD64<sup>+</sup>) and dendritic cells (MHCII<sup>+</sup>CD11b<sup>+</sup>) in Treg depleted APC<sup>min/+</sup>/DEREG and control APC<sup>min/+</sup> mice were investigated by flow cytometry. Symbols represent individual mice and lines represent median (n=6-8). \*\**p* < 0.01, \*\*\**p* < 0.001; Mann-Whitney

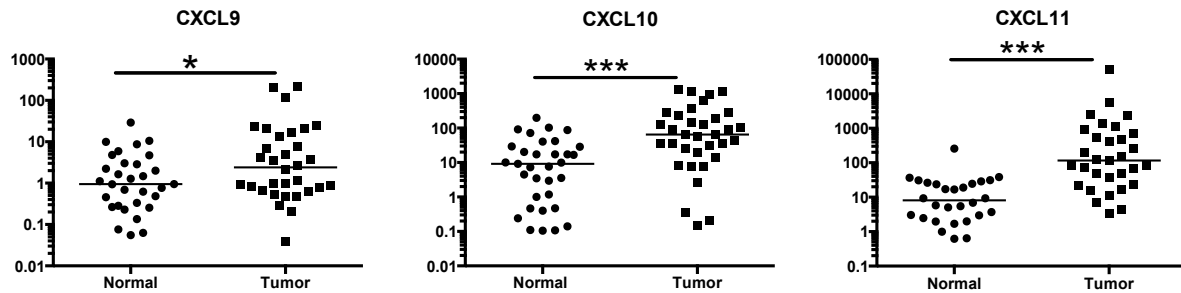

**Supplementary figure 5: High expression of CXCR3 ligands in human colon tumors.**

Tumor tissue and paired unaffected colon tissue from patient with colon adenocarcinoma were examined for expression of CXCL9, CXCL10 and CXCL11 mRNA by quantitative real-time PCR normalized against 18s. Symbols represent individual patients and lines represent median (n=27-31). \**p* < 0.05, \*\*\**p* < 0.001; Mann-Whitney.
